# Supplementary material
Source: Springer Nature journal article supplement (https://www.springermedizin.de/resource/supplementary/12967_2009_353_MOESM7_ESM.pdf/9576286)

Standardised Z-scores  
Factor 1

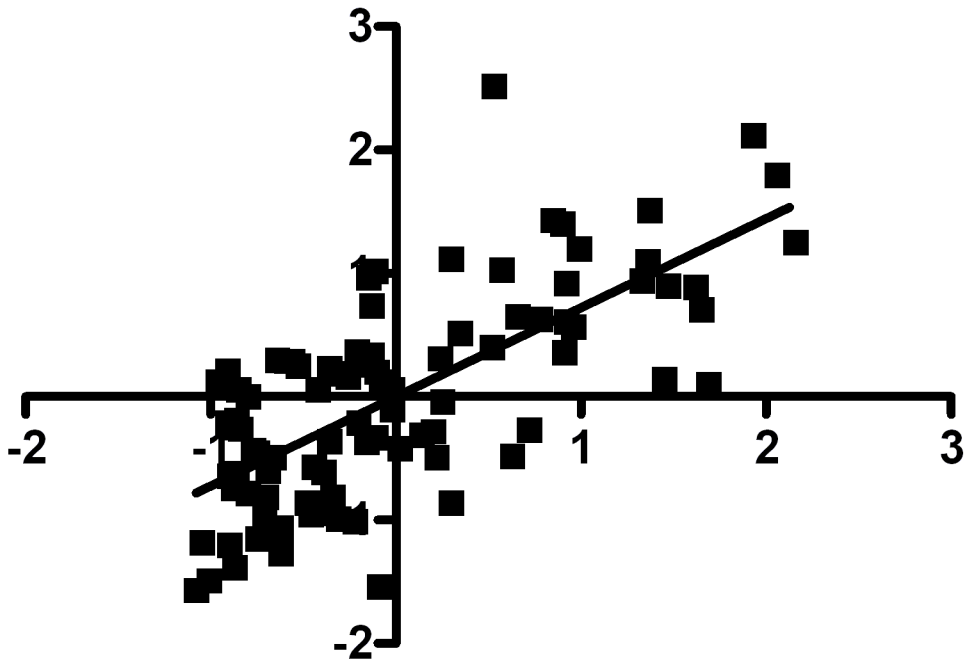

Standardised Z-scores Factor 14

Supplement: MOESM7 [file 9576286]
